# Supplementary material for: Hybridization within Saccharomyces Genus Results in Homoeostasis and Phenotypic Novelty in Winemaking Conditions
Source: PubMed Central journal article supplement (PMC4422614; doi:10.1371/journal.pone.0123834), 2015-05-06

fermentations at 18°C

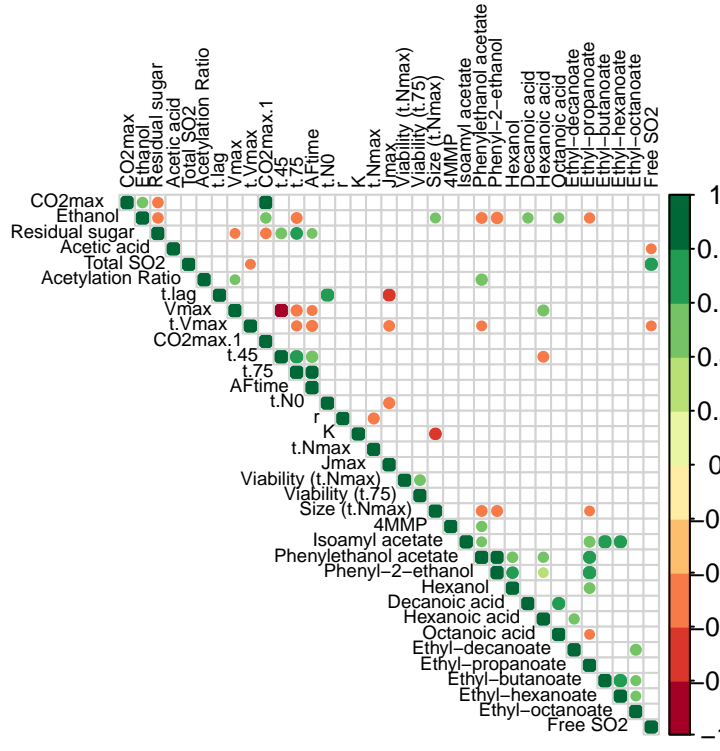

fermentations at 26°C

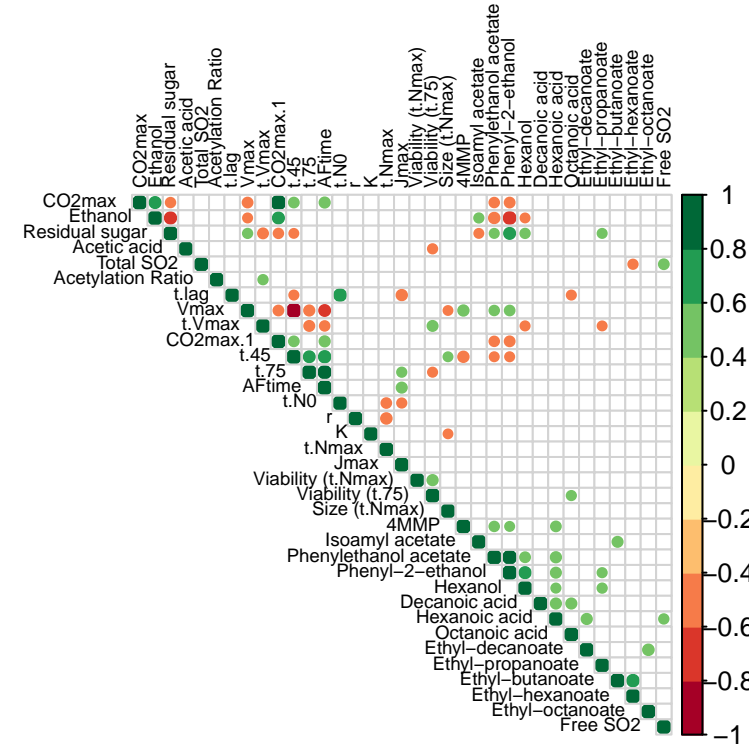

Supplement: pone.0123834.s005.pdf [file pone.0123834.s005.pdf]
